# Supplementary material for: Genomic Characterization of hox Genes in Senegalese Sole (Solea senegalensis, Kaup 1858): Clues to Evolutionary Path in Pleuronectiformes
Source: MDPI journal article supplement (doi:10.3390/ani12243586), 2022-12-19
Supplement: s1 [file s1]

**Table S1.** NCBI Accession Numbers of the cds used for the phylogeny.

|                                 | <b>hoxa1a</b>  | <b>hoxa3a</b>  | <b>hoxa4a</b>  | <b>hoxa5a</b>  | <b>hoxa9a</b>  | <b>hoxa11a</b> | <b>hoxa13a</b> | <b>evx</b>     |
|---------------------------------|----------------|----------------|----------------|----------------|----------------|----------------|----------------|----------------|
| <i>Solea senegalensis</i>       | XM_044053073.1 | XM_044053071.1 | XM_044053076.1 | XM_044053074.1 | XM_044052424.1 | XM_044052423.1 | XM_044052421.1 | XM_044052420.1 |
| <i>Hipoglossus hippoglossus</i> | XM_034599294.1 | XM_034599289.1 | XM_034599297.1 | XM_034599295.1 | XM_034600629.1 | XM_034600489.1 | XM_034600488.1 | XM_034600485.1 |
| <i>Paralichthys olivaceus</i>   | XM_020090485.1 | XM_020090478.1 | XM_020090490.1 | XM_020090487.1 | XM_020090489.1 | XM_020090488.1 | XM_020090486.1 | XM_020090482.1 |
| <i>Scophthalmus maximus</i>     | XM_035621516.2 | XM_035621509.2 | XM_035621521.2 | XM_035621518.2 | XM_035621520.2 | XM_035621519.2 | XM_035621517.2 | XM_035620695.2 |
| <i>Cynoglossus semilaevis</i>   | XM_008331460.3 | XM_008331457.3 | XM_008331455.3 | XM_008331454.3 | XM_008331453.3 | XM_017040992.2 | XM_035621517.2 | XM_008331448.3 |
| <i>Echeneis naucrates</i>       | XM_029513552.1 | XM_029513549.1 | XM_029514003.1 | XM_029513665.1 | XM_029513872.1 | XM_029513686.1 | XM_029514409.1 | XM_029514683.1 |
| <i>Seriola lalandi</i>          | XM_023431029.1 | XM_023431021.1 | XM_023431027.1 | XM_023431026.1 | XM_023431047.1 | XM_023431046.1 | XM_023431101.1 | XM_023431102.1 |
| <i>Seriola dumerili</i>         | XM_022747292.1 | XM_022746931.1 | XM_022747273.1 | XM_022746996.1 | XM_022747200.1 | XM_022747381.1 | XM_022747507.1 | XM_022747641.1 |
| <i>Oreochromis niloticus</i>    | XM_005453829.4 | XM_025902218.1 | XM_005453825.4 | XM_003448866.5 | XM_003448867.5 | XM_003448869.5 | XM_003448870.5 | XM_019350306.2 |
| <i>Gasterosteus aculeatus</i>   | XM_040188613.1 | XM_040188611.1 | XM_040188616.1 | XM_040188614.1 | XM_040189069.1 | XM_040189494.1 | XM_040189495.1 | XM_040187830.1 |
| <i>Sparus aurata</i>            | XM_030412081.1 | XM_030412077.1 | XM_030412083.1 | XM_030412082.1 | XM_030411218.1 | XM_030411377.1 | XM_030411402.1 | XM_030411493.1 |
| <i>Danio Rerio</i>              | XM_017352263.2 | NM_131534.1    | NM_131535.1    | NM_131540.1    | NM_131532.2    | NM_131544.1    | NM_001085494.1 | NM_131249.2    |
| <i>Lepisosteus oculatus</i>     | XM_006636214.2 | XM_015357856.1 | XM_006636215.2 | XM_040121442.1 | XM_006636060.2 | XM_006636062.2 | XM_006636063.2 | XM_006636064.2 |
| <i>Xiphias gladius</i>          | XM_040121762.1 | XM_040121211.1 | XM_040121212.1 | XM_040121442.1 | XM_040121443.1 | XM_040122188.1 | XM_040122187.1 | XM_040122175.1 |
| <i>Lates calcarifer</i>         | XM_018667274.2 | XM_018667166.2 | XM_018667365.2 | XM_018667300.2 | XM_018667353.2 | XM_018667321.2 | XM_018667311.2 | XM_051066022.1 |
| <i>Toxotes jaculatrix</i>       | XM_041052839.1 | XM_041052832.1 | XM_041052835.1 | XM_041052834.1 | XM_041053228.1 | XM_041053999.1 | XM_041053560.1 | XM_041053805.1 |
| <i>Oryzias latipes</i>          | XM_004073855.3 | XM_011480872.3 | XM_011480868.3 | AB207979.1     | NM_001104666.1 | XM_004073858.3 | XM_004073861.4 | XM_004073862.4 |
| <i>Takifugu rubripes</i>        | XM_011609092.2 | XM_029844659.1 | XM_011609093.2 | XM_029845496.1 | XM_011609098.2 | XM_003968984.2 | XM_003968986.3 | XM_003968987.2 |
| <i>Anguilla anguilla</i>        | XM_035430802.1 | XM_035429976.1 | XM_035429982.1 | XM_035429980.1 | XM_035427867.1 | XM_035427866.1 | XM_035428605.1 | XM_035428604.1 |
| <i>Latimeria chalumnae</i>      | XM_005993081.2 | XM_014486712.1 | XM_005993086.1 | XM_005993085.1 | XM_005993082.2 | XM_005993088.1 | XM_005993090.1 | XM_005993091.1 |
| <i>Amblyraya radiata</i>        | XM_033047630.1 | XM_033039426.1 | XM_033047665.1 | XM_033047653.1 | XM_033047583.1 | XM_033047552.1 | XM_033047538.1 | XM_033047535.1 |
| <i>Rhincodon typus</i>          | XM_020526887.2 | XM_048611197.1 | XM_020526900.2 | XM_020526899.2 | XM_048611312.1 | XM_020526889.2 | XM_020526886.2 | XM_020536619.2 |
| <i>Callorhinchus milii</i>      | XM_007900497.2 | XM_007900492.2 | XM_007900493.2 | XM_007900494.2 | XM_007900488.2 | XM_007900484.2 | XM_007900483.2 | XM_007900540.1 |

|                                 | <b>hoxa2b</b>  | <b>hoxa9b</b>  | <b>hoxa10b</b> | <b>hoxa11b</b> | <b>hoxa13b</b> |
|---------------------------------|----------------|----------------|----------------|----------------|----------------|
| <i>Solea senegalensis</i>       | XM_044033439.1 | XM_044034539.1 | XM_044033386.1 | XM_044034522.1 | XM_044034543.1 |
| <i>Hipoglossus hippoglossus</i> | XM_034610224.1 | XM_034610226.1 | XM_034610221.1 | XM_034610225.1 | XM_034610236.1 |
| <i>Paralichthys olivaceus</i>   | XM_020107684.1 | XM_020092794.1 | XM_020092572.1 | XM_020092579.1 | XM_020092802.1 |
| <i>Scophthalmus maximus</i>     | XM_035636648.2 | XM_035636686.2 | XM_035636662.2 | XM_035636674.2 | XM_035629046.2 |
| <i>Cynoglossus semilaevis</i>   | XM_008323392.3 | XM_008323390.2 | XM_008323389.2 | XM_008323388.3 | XM_008323386.3 |
| <i>Echeneis naucrates</i>       | XM_029504329.1 | XM_029504881.1 | XM_029504979.1 | XM_029504837.1 | XM_029504659.1 |
| <i>Seriola lalandi</i>          | XM_023403084.1 | XM_023403097.1 | XM_023403096.1 | XM_023403164.1 | XM_023403095.1 |
| <i>Seriola dumerili</i>         | XM_022768488.1 | XM_022768490.1 | XM_022768501.1 | XM_022768479.1 | XM_022768482.1 |
| <i>Oreochromis niloticus</i>    | XM_003454387.5 | XM_003454385.5 | XM_003454384.5 | XM_013277030.3 | XM_003454381.5 |
| <i>Gasterosteus aculeatus</i>   | XM_040165939.1 | XM_040166346.1 | XM_040166343.1 | XM_040166345.1 | XM_040164158.1 |
| <i>Sparus aurata</i>            | XM_030392801.1 | XM_030394498.1 | XM_030392736.1 | XM_030392737.1 | XM_030394543.1 |
| <i>Danio Rerio</i>              | NM_131106.1    | XM_005157968.4 | XM_005157954.4 | NM_131147.1    | NM_131194.2    |
| <i>Lepisosteus oculatus</i>     | XM_006636056.2 | XM_006636060.2 | XM_006636061.2 | XM_006636062.2 | XM_006636063.2 |
| <i>Xiphias gladius</i>          | XM_040118965.1 | XM_040118330.1 | XM_040118332.1 | XM_040116839.1 | XM_040118290.1 |
| <i>Lates calcarifer</i>         | XM_018680462.2 | XM_018680450.2 | XM_018688598.2 | XM_018688590.2 | XM_018688576.2 |
| <i>Toxotes jaculatrix</i>       | XM_041044579.1 | XM_041044823.1 | XM_041044841.1 | XM_041044815.1 | XM_041044785.1 |
| <i>Oryzias latipes</i>          | XM_004077830.3 | NM_001104665.1 | XM_004077829.3 | XM_004077828.4 | XM_004077827.4 |
| <i>Takifugu rubripes</i>        | XM_003966101.3 | XM_029838911.1 | XM_003966103.3 | XM_003966104.2 | XM_029839402.1 |
| <i>Anguilla anguilla</i>        | XM_035409817.1 | XM_035400461.1 | XM_035400203.1 | XM_035400328.1 | XM_035387260.1 |
| <i>Latimeria chalumnae</i>      | XM_005993080.2 | XM_005993082.2 | XM_005993087.2 | XM_005993088.1 | XM_005993090.1 |
| <i>Amblyraja radiata</i>        | XM_033039426.1 | XM_033047583.1 | XM_033047542.1 | XM_033047552.1 | XM_033047538.1 |
| <i>Rhincodon typus</i>          | XM_020526898.2 | XM_048611312.1 | XM_048611236.1 | XM_020526889.2 | XM_020526886.2 |
| <i>Callorhinchus milii</i>      | XM_007900496.2 | XM_007900488.2 | XM_007900485.2 | XM_007900484.2 | XM_007900483.2 |

|                                 | <b>hoxb1a</b>  | <b>hoxb3a</b>  | <b>hoxb5a</b>  | <b>hoxb6a</b>  | <b>hoxb9a</b>  | <b>hoxb13a</b> |
|---------------------------------|----------------|----------------|----------------|----------------|----------------|----------------|
| <i>Solea senegalensis</i>       | XM_044051227.1 | XM_044050658.1 | XM_044050659.1 | XM_044050661.1 | XM_044051907.1 | XM_044051185.1 |
| <i>Hipoglossus hippoglossus</i> | XM_034594345.1 | XM_034594317.1 | XM_034594349.1 | XM_034594353.1 | XM_034594356.1 | XM_034594347.1 |
| <i>Paralichthys olivaceus</i>   | XM_020103654.1 | XM_020103679.1 | XM_020103682.1 | XM_020103683.1 | XM_020103664.1 | XM_020103651.1 |
| <i>Scophthalmus maximus</i>     | XM_035616535.2 | XM_035616288.2 | XM_035616290.2 | XM_035616291.2 | XM_035616466.2 | XM_035615299.1 |
| <i>Cynoglossus semilaevis</i>   | XM_025064707.1 | XM_017040668.2 | XM_025064542.1 | XM_008330559.3 | XM_025064731.1 | XM_008330561.3 |
| <i>Echeneis naucrates</i>       | XM_029508103.1 | XM_029507856.1 | XM_029507661.1 | XM_029507662.1 | XM_029507920.1 | XM_029508846.1 |
| <i>Seriola lalandi</i>          | XM_023426183.1 | XM_023426164.1 | XM_023426170.1 | XM_023426171.1 | XM_023426230.1 | XM_023426222.1 |
| <i>Seriola dumerili</i>         | XM_022753730.1 | XM_022753675.1 | XM_022753682.1 | XM_022753683.1 | XM_022753704.1 | XM_022753723.1 |
| <i>Oreochromis niloticus</i>    | XM_019358339.2 | XM_019358338.2 | XM_003446381.5 | XM_019358340.2 | XM_003446378.5 | XM_005468651.4 |
| <i>Gasterosteus aculeatus</i>   | XM_040191944.1 | XM_040190248.1 | XM_040190250.1 | XM_040190252.1 | XM_040191827.1 | XM_040189974.1 |
| <i>Sparus aurata</i>            | XM_030408440.1 | XM_030406674.1 | XM_030406675.1 | XM_030406676.1 | XM_030406487.1 | XM_030406722.1 |
| <i>Danio Rerio</i>              | NM_131115.2    | NM_131117.3    | NM_131101.2    | NM_131119.1    | NM_131121.2    | NM_001044912.1 |
| <i>Lepisosteus oculatus</i>     | XM_006638354.2 | XM_015362327.1 | XM_006638313.2 | XM_015362336.1 | XM_006638318.2 | XM_006638319.2 |
| <i>Xiphias gladius</i>          | XM_040116601.1 | XM_040124198.1 | XM_040124199.1 | XM_040124200.1 | XM_040122740.1 | XM_040123441.1 |
| <i>Lates calcarifer</i>         | XM_018698423.1 | XM_018698427.2 | XM_018698431.2 | XM_018698432.2 | XM_018698466.2 | XM_018698421.2 |
| <i>Toxotes jaculatrix</i>       | XM_041063124.1 | XM_041063340.1 | XM_041063218.1 | XM_041063219.1 | XM_041063546.1 | XM_041062950.1 |
| <i>Oryzias latipes</i>          | XM_011478648.3 | XM_023957835.1 | XM_004072012.4 | XM_023957838.1 | XM_004071881.4 | XM_023957823.1 |
| <i>Takifugu rubripes</i>        | XM_003964295.2 | XM_029836636.1 | XM_003964258.3 | XM_003964257.3 | XM_011603555.2 | XM_003964255.2 |
| <i>Anguila anguila</i>          | XM_035397161.1 | XM_035403788.1 | XM_035397164.1 | XM_035397169.1 | XM_035397165.1 | XM_035397162.1 |
| <i>Latimeria chalumnae</i>      | XM_005990053.1 | XM_005990050.2 | XM_005990046.2 | XM_005990045.2 | XM_005990041.2 | XM_005990054.1 |
| <i>Amblyraya radiata</i>        | XM_033034952.1 | XM_033034945.1 | XM_033034953.1 | XM_033034958.1 | XM_033034954.1 | XM_033034951.1 |
| <i>Rhincodon typus</i>          | XM_020531408.2 | XM_048614599.1 | XM_020531412.2 | XM_020531409.2 | XM_020531413.2 | XM_020531396.2 |
| <i>Callorhinchus milii</i>      | XM_007904378.2 | XM_007904364.2 | XM_007904370.2 | XM_007904371.2 | XM_007904375.2 | XM_007904360.2 |

|                                  | <b>hoxb1b</b>  | <b>hoxb5b</b>  |
|----------------------------------|----------------|----------------|
| <i>Solea senegalensis</i>        | XM_044014574.1 | XM_044014573.1 |
| <i>Hippoglossus hippoglossus</i> | XM_034570616.1 | XM_034570614.1 |
| <i>Paralichthys olivaceus</i>    | XM_020106567.1 | XM_020106568.1 |
| <i>Scophthalmus maximus</i>      | XM_035612398.2 | XM_035612401.2 |
| <i>Cynoglossus semilaevis</i>    | XM_008314492.3 | XM_008314452.3 |
| <i>Echeneis naucrates</i>        | XM_029527845.1 | XM_029527121.1 |
| <i>Seriola lalandi</i>           | XM_023406840.1 | XM_023406839.1 |
| <i>Seriola dumerili</i>          | XM_022743186.1 | XM_022742604.1 |
| <i>Oreochromis niloticus</i>     | XM_003448649.5 | XM_003448647.5 |
| <i>Gasterosteus aculeatus</i>    | XM_040176913.1 | XM_040176912.1 |
| <i>Sparus aurata</i>             | XM_030399848.1 | XM_030399847.1 |
| <i>Danio Rerio</i>               | NM_131142.2    | NM_131537.3    |
| <i>Lepisosteus oculatus</i>      | XM_006638354.2 | XM_006638313.2 |
| <i>Xiphias gladius</i>           | XM_040134617.1 | XM_040135901.1 |
| <i>Lates calcarifer</i>          | XM_018689446.2 | XM_018689447.2 |
| <i>Toxotes jaculatrix</i>        | XM_041029554.1 | XM_041029556.1 |
| <i>Oryzias latipes</i>           | XM_004080650.4 | XM_004080652.4 |
| <i>Takifugu rubripes</i>         | XM_003961127.3 | XM_003961079.3 |
| <i>Anguilla anguilla</i>         | XM_035403800.1 | XM_035403807.1 |
| <i>Latimeria chalumnae</i>       | XM_005990053.1 | XM_005990046.2 |
| <i>Amblyraya radiata</i>         | XM_033034952.1 | XM_033034953.1 |
| <i>Rhincodon typus</i>           | XM_020531408.2 | XM_020531412.2 |
| <i>Callorhynchus milii</i>       | XM_007904378.2 | XM_007904370.2 |

|                                 | hoxc5a         | hoxc6a         | hoxc8a         | hoxc9a         | hoxc10a        | hoxc11a        | hoxc12a        | hoxc13a        |
|---------------------------------|----------------|----------------|----------------|----------------|----------------|----------------|----------------|----------------|
| <i>Solea senegalensis</i>       | XM_044038514.1 | XM_044038513.1 | XM_044038511.1 | XM_044038510.1 | XM_044038503.1 | XM_044037399.1 | XM_044037415.1 | XM_044038825.1 |
| <i>Hipoglossus hippoglossus</i> | XM_034590502.1 | XM_034590500.1 | XM_034590703.1 | XM_034590702.1 | XM_034591162.1 | XM_034590701.1 | XM_034590360.1 | XM_034590359.1 |
| <i>Paralichthys olivaceus</i>   | XM_020095981.1 | XM_020095980.1 | XM_020078106.1 | XM_020095976.1 | XM_020095968.1 | XM_020095971.1 | XM_020095975.1 | XM_020095974.1 |
| <i>Scophthalmus maximus</i>     | XM_035643931.2 | XM_035643941.2 | XM_035643938.2 | XM_035643937.2 | XM_047330863.1 | XM_035643932.2 | XM_035643936.2 | XM_035643934.2 |
| <i>Cynoglossus semilaevis</i>   | XM_008318907.3 | XM_008318906.2 | XM_008318904.2 | XM_008318905.2 | XM_008318903.3 | XM_008318901.3 | XM_008318900.3 | XM_008318897.3 |
| <i>Echeneis naucrates</i>       | XM_029507229.1 | XM_029507226.1 | XM_029506122.1 | XM_029506037.1 | XM_029506665.1 | XM_029506646.1 | XM_029507034.1 | XM_029506736.1 |
| <i>Seriola lalandi</i>          | XM_023425109.1 | XM_023425108.1 | XM_023425106.1 | XM_023425104.1 | XM_023425100.1 | XM_023425095.1 | XM_023425084.1 | XM_023425254.1 |
| <i>Seriola dumerili</i>         | XM_022741581.1 | XM_022741570.1 | XM_022741538.1 | XM_022741573.1 | XM_022741739.1 | XM_022741748.1 | XM_022741805.1 | XM_022741750.1 |
| <i>Oreochromis niloticus</i>    | XM_003448188.4 | XM_005478041.3 | XM_003448186.5 | XM_003448185.5 | XM_003448184.3 | XM_003448182.5 | XM_003448181.5 | XM_004070462.4 |
| <i>Gasterosteus aculeatus</i>   | XM_040193469.1 | XM_040193467.1 | XM_040193465.1 | XM_040193464.1 | XM_040193460.1 | XM_040193462.1 | XM_040194476.1 | XM_040194520.1 |
| <i>Sparus aurata</i>            | XM_030423192.1 | XM_030423191.1 | XM_030423189.1 | XM_030423188.1 | XM_030423184.1 | XM_030422665.1 | XM_030422667.1 | XM_030422666.1 |
| <i>Danio Rerio</i>              | NM_131144.2    | NM_131123.1    | NM_001005771.1 | NM_131528.3    | NM_001254944.1 | NM_131165.2    | NM_001110759.1 | NM_131543.1    |
| <i>Lepisosteus oculatus</i>     | XM_006629272.2 | XM_006629271.2 | XM_006629270.2 | XM_006629269.2 | XM_006629268.2 | XM_006629267.2 | XM_015344107.1 | XM_006629265.2 |
| <i>Xiphias gladius</i>          | XM_040152049.1 | XM_040152047.1 | XM_040152045.1 | XM_040152976.1 | XM_040152175.1 | XM_040152174.1 | XM_040152177.1 | XM_040152176.1 |
| <i>Lates calcarifer</i>         | XM_018665902.2 | XM_018665900.2 | XM_018665899.2 | XM_018665898.2 | XM_051071212.1 | XM_018665893.2 | XM_018665895.2 | XM_018665892.2 |
| <i>Toxotes jaculatrix</i>       | XM_041059700.1 | XM_041059688.1 | XM_041059666.1 | XM_041059655.1 | XM_041059575.1 | XM_041056775.1 | XM_041058361.1 | XM_041057384.1 |
| <i>Oryzias latipes</i>          | XM_004070714.4 | XM_004070467.4 | NM_001163250.1 | NM_001201492.1 | XM_020704671.2 | XM_004070464.4 | XM_004070463.4 | XM_004070462.4 |
| <i>Takifugu rubripes</i>        | XM_011621867.2 | XM_003963064.3 | XM_003963065.3 | XM_003963066.3 | XM_003963153.2 | XM_003963067.3 | XM_003963069.3 | XM_003963070.3 |
| <i>Anguilla anguilla</i>        | XM_035382996.1 | XM_035383001.1 | XM_035388349.1 | XM_035383655.1 | XM_035383654.1 | XM_035382979.1 | XM_035381351.1 | XM_035382953.1 |
| <i>Latimeria chalumnae</i>      | XM_005995613.1 | XM_005995612.2 | XM_005995619.2 | XM_005995620.1 | XM_005995621.2 | XM_005995623.2 | XM_005995624.2 | XM_005995625.2 |
| <i>Callorhynchus milii</i>      | XM_007909661.2 | XM_007909660.1 | XM_007909657.2 | XM_007909658.1 | XM_007909656.2 | XM_007909653.2 | XM_007909654.2 | XM_007909652.2 |

|                                 | hoxd3a         | hoxd4a         | hoxd10a        | hoxd11a        | hoxd12a        | evx            |
|---------------------------------|----------------|----------------|----------------|----------------|----------------|----------------|
| <i>Solea senegalensis</i>       | XM_044018128.1 | XM_044018137.1 | XM_044051409.1 | XM_044050496.1 | XM_044019062.1 | XM_044019140.1 |
| <i>Hipoglossus hippoglossus</i> | XM_034574562.1 | XM_034574563.1 | XM_034574122.1 | XM_034574156.1 | XM_034574221.1 | XM_034575001.1 |
| <i>Paralichthys olivaceus</i>   | XM_020089916.1 | XM_020089920.1 | XM_020089917.1 | XM_020089921.1 | XM_020089806.1 | XM_020089889.1 |
| <i>Scophthalmus maximus</i>     | XM_035603933.2 | XM_035603939.2 | XM_035603934.2 | XM_035603935.2 | XM_035603938.2 | XM_035603932.2 |
| <i>Cynoglossus semilaevis</i>   | XM_017039818.2 | XM_008328316.3 | XM_017039824.2 | XM_008328310.2 | XM_017039822.2 | XM_008328309.3 |
| <i>Echeneis naucrates</i>       | XM_029529979.1 | XM_029529980.1 | XM_029530595.1 | XM_029530622.1 | XM_029530946.1 | XM_029492877.1 |
| <i>Seriola lalandi</i>          | XM_023405695.1 | XM_023405697.1 | XM_023405688.1 | XM_023405689.1 | XM_023405693.1 | XM_023405694.1 |
| <i>Seriola dumerili</i>         | XM_022740452.1 | XM_022740454.1 | XM_022740964.1 | XM_022740952.1 | XM_022741150.1 | XM_022741205.1 |
| <i>Oreochromis niloticus</i>    | XM_025904031.1 | XM_005452901.4 | XM_003447300.5 | XM_005452905.3 | XM_003447301.5 | XM_003447302.5 |
| <i>Gasterosteus aculeatus</i>   | XM_040202138.1 | XM_040202139.1 | XM_040202511.1 | XM_040202512.1 | XM_040200614.1 | XM_040202546.1 |
| <i>Sparus aurata</i>            | XM_030429544.1 | XM_030429545.1 | XM_030428626.1 | XM_030428631.1 | XM_030428630.1 | XM_030428624.1 |
| <i>Danio Rerio</i>              | XM_021478602.1 | NM_001126445.2 | NM_131166.2    | NM_131167.1    | NM_001126486.1 | NM_131232.2    |
| <i>Lepisosteus oculatus</i>     | XM_006636490.2 | XM_006636491.2 | XM_006636493.2 | XM_006636494.2 | XM_006636495.2 | XM_006636497.2 |
| <i>Xiphias gladius</i>          | XM_040148524.1 | XM_040148528.1 | XM_040148963.1 | XM_040149453.1 | XM_040149452.1 | XM_040149449.1 |
| <i>Lates calcarifer</i>         | XM_018675791.2 | XM_018675792.2 | XM_018675786.2 | XM_018675790.2 | XM_018675788.2 | XM_018675785.2 |
| <i>Toxotes jaculatrix</i>       | XM_041057208.1 | XM_041057210.1 | XM_041057454.1 | XM_041057425.1 | XM_041057534.1 | XM_041057692.1 |
| <i>Oryzias latipes</i>          | XM_011489801.3 | AB232923.1     | XM_004081767.4 | XM_011489797.3 | XM_004081928.4 | XM_023951144.1 |
| <i>Takifugu rubripes</i>        | XM_029846105.1 | XM_011609482.2 | XM_003961830.2 | XM_011609522.2 | XM_003961831.2 | XM_003961832.2 |
| <i>Anguilla anguilla</i>        | XM_035410365.1 | XM_035410369.1 | XM_035411116.1 | XM_035411178.1 | XM_035411313.1 | XM_035411038.1 |
| <i>Latimeria chalumnae</i>      | XM_014491156.1 | XM_006000588.1 | XM_006000596.2 | XM_006000595.2 | XM_006000597.2 | XM_006000598.1 |
| <i>Amblyraya radiata</i>        | XM_033023884.1 | XM_033023894.1 | XM_033023886.1 | XM_033023889.1 | XM_033023890.1 | XM_033023899.1 |
| <i>Rhincodon typus</i>          | XM_048598653.1 | XM_048598655.1 | XM_020520271.2 | XM_048598765.1 | XM_020519727.2 | XM_020519402.2 |
| <i>Callorhynchus milii</i>      | XM_007890055.2 | XM_007890050.2 | XM_007890043.2 | XM_007890044.2 | XM_007890045.2 | XM_007890041.2 |

|                                 | <b>hoxd0b4</b> | <b>hoxd9b</b>  |
|---------------------------------|----------------|----------------|
| <i>Solea senegalensis</i>       | XM_044045041.1 | XM_044045040.1 |
| <i>Hipoglossus hippoglossus</i> | XM_034609295.1 | XM_034609296.1 |
| <i>Paralichthys olivaceus</i>   | XM_020093164.1 | XM_020093177.1 |
| <i>Scophthalmus maximus</i>     | XM_035606243.2 | XM_035606240.2 |
| <i>Cynoglossus semilaevis</i>   | XM_025061184.1 | XM_008322471.2 |
| <i>Echeneis naucrates</i>       | XM_029521336.1 | XM_029521333.1 |
| <i>Seriola lalandi</i>          | XM_023393510.1 | XM_023393508.1 |
| <i>Seriola dumerili</i>         | XM_022752839.1 | XM_022752836.1 |
| <i>Oreochromis niloticus</i>    | XM_003438338.5 | XM_003438242.5 |
| <i>Gasterosteus aculeatus</i>   | XM_040178745.1 | XM_040178742.1 |
| <i>Sparus aurata</i>            | XM_030442627.1 | XM_030441114.1 |
| <i>Lepisosteus oculatus</i>     | XM_006636491.2 | XM_006636577.2 |
| <i>Xiphias gladius</i>          | XM_040139702.1 | XM_040139778.1 |
| <i>Lates calcarifer</i>         | XM_018693801.2 | XM_018693803.2 |
| <i>Toxotes jaculatrix</i>       | XM_041049176.1 | XM_041049172.1 |
| <i>Oryzias latipes</i>          | AB208019.1     | AB208020.1     |
| <i>Takifugu rubripes</i>        | XM_003963848.3 | XM_003963805.3 |
| <i>Anguila anguila</i>          | XM_035392667.1 | XM_035392665.1 |
| <i>Latimeria chalumnae</i>      | XM_006000588.1 | XM_006000594.2 |
| <i>Amblyraya radiata</i>        | XM_033047665.1 | XM_033023891.1 |
| <i>Rhincodon typus</i>          | XM_048598655.1 | XM_048611304.1 |
| <i>Callorhynchus milii</i>      | XM_007890050.2 | XM_007890047.2 |

a)

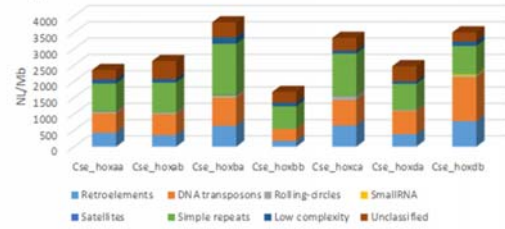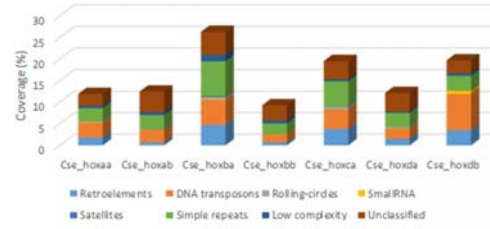

b)

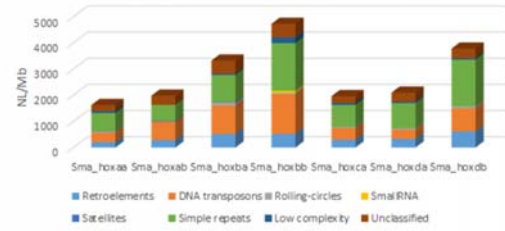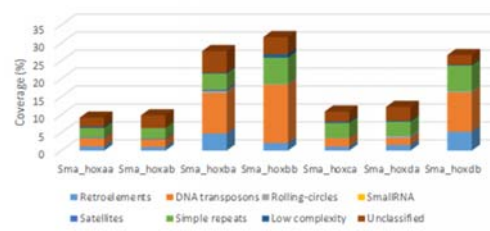

c)

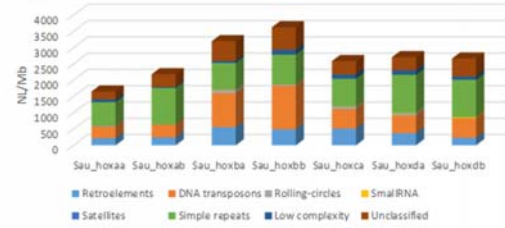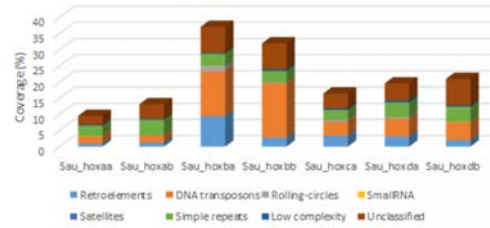

d)

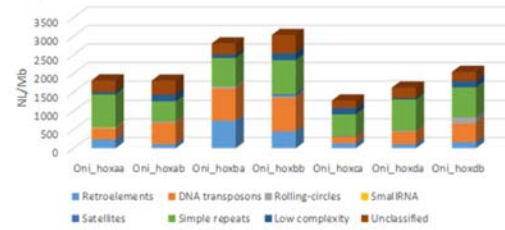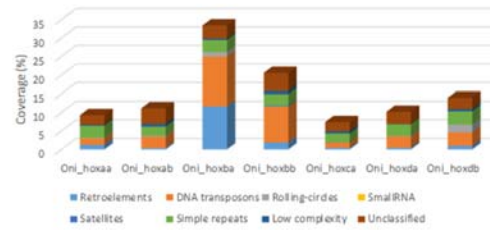



**Figure S1.** Number of loci per Mb and coverage of repetitive elements in seven *hox* cluster of (a) *Cynoglossus semilaevis*, (b) *Scophthalmus maximus*, (c) *Sparus aurata* and (d) *Oreochromis niloticus*. The repetitive elements analyzed were Retroelements, DNA transposons, small RNA, rolling circles, satellites, simple repeats and unclassified repetitive sequences (Unknown).

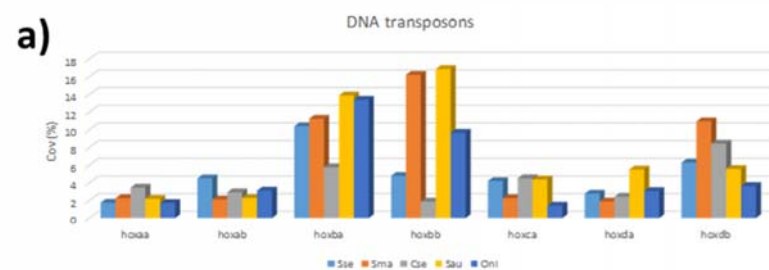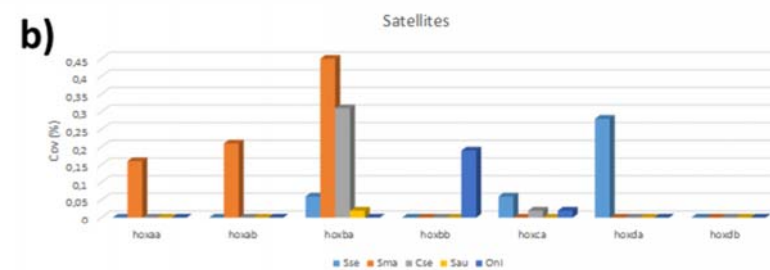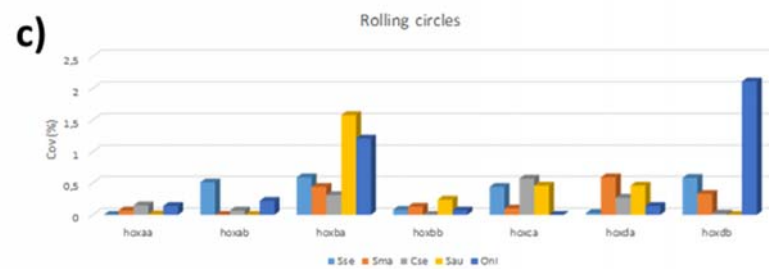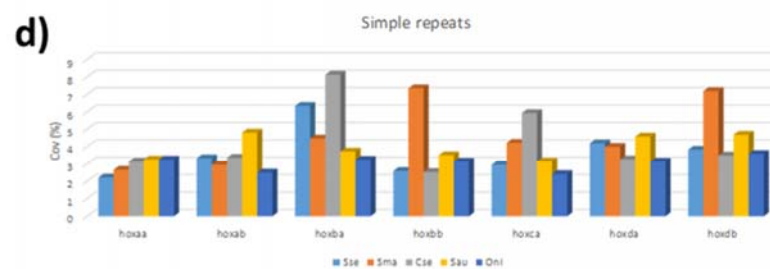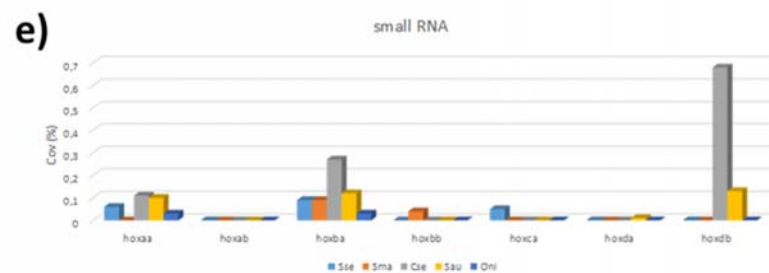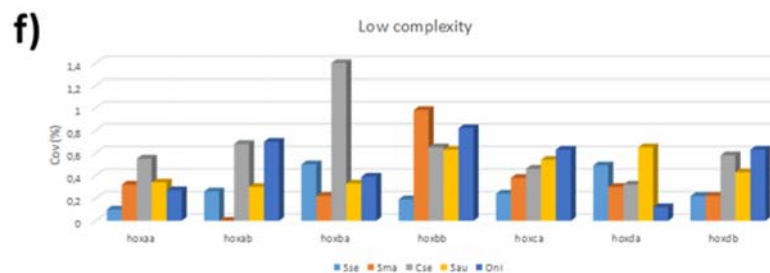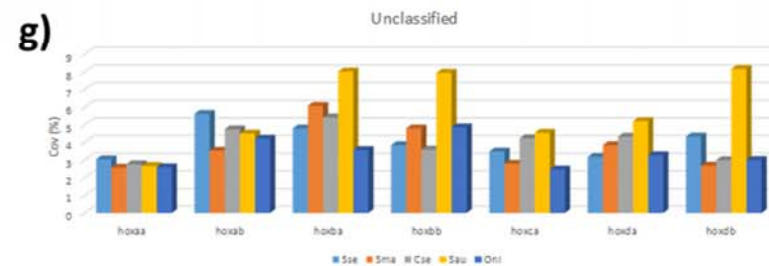

**Figure S2.** Coverage (%) of (a) DNA transposons, (b) satellites, (c) rolling circles, (d) simple repeats, (e) small RNA, (f) low complexity and (g) unclassified repetitive sequences (Unknown) in seven *hox* cluster of five fish species: *Solea senegalensis*, *Scophthalmus maximus*, *Cynoglossus semilaevis*, *Sparus aurata* and *Oreochromis niloticus*.

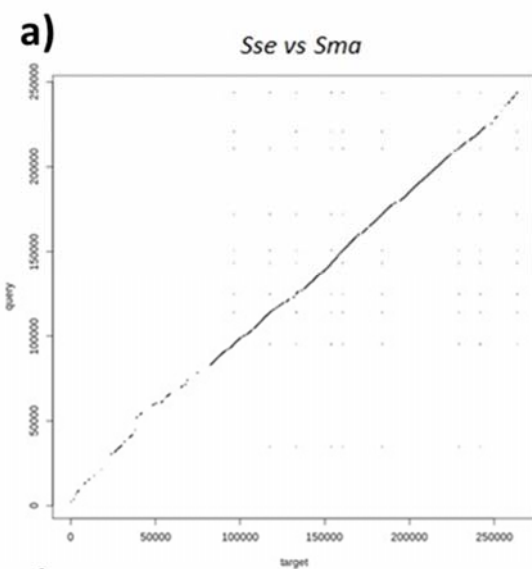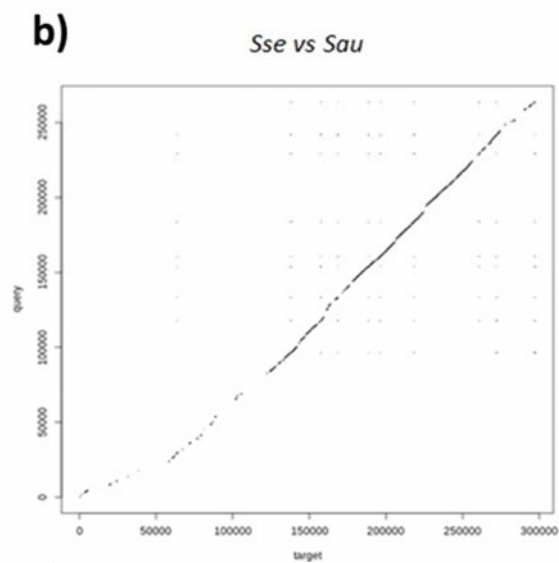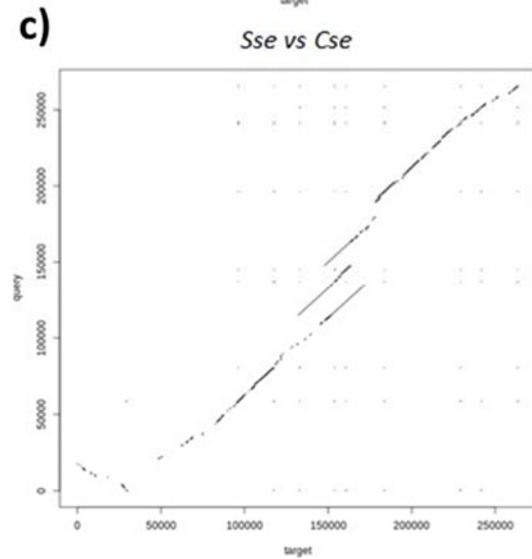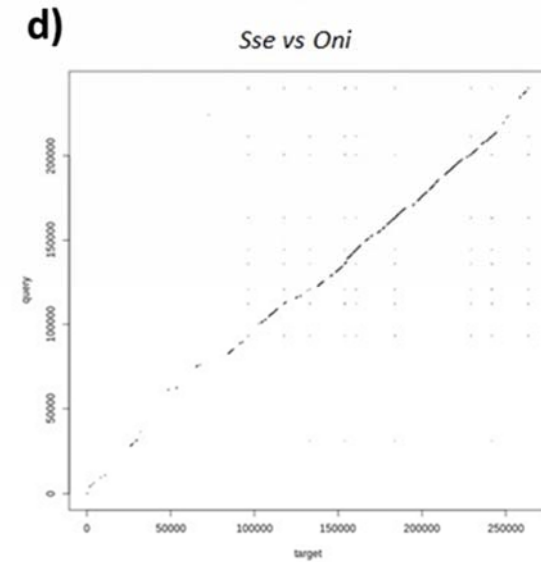

**Figure S3.** Nucleotide dot plots of the *hoxba* cluster sequence stretch between *Solea senegalensis* and (a) *Scophthalmus maximus*, (b) *Sparus aurata*, (c) *Cynoglossus semilaevis* or (d) *Oreochromis niloticus*.

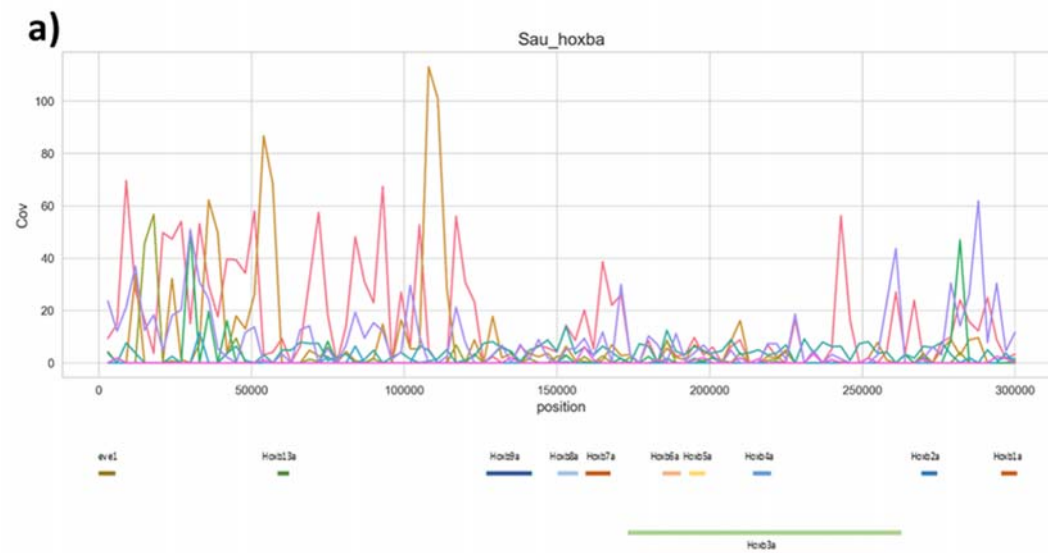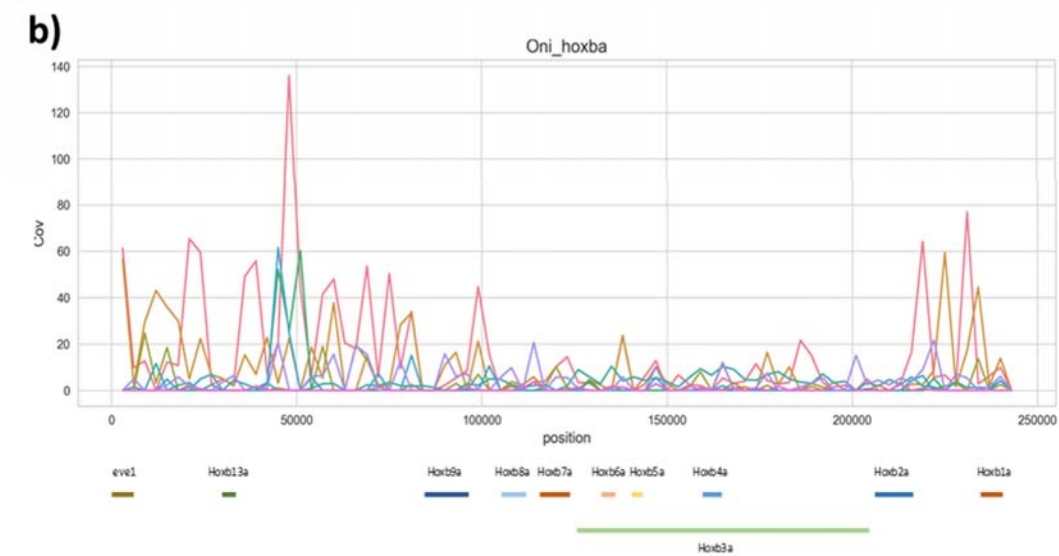

**Figure S4.** Abundance of repetitive elements, measured as coverage (%), along the *hoxba* cluster sequence of two teleost species (sliding window 3kb): (a) *Sparus aurata* and (b) *Oreochromis niloticus*. Repetitive elements analyzed were: DNA transposon (light red), LINEs (light orange), LTRs (light green), RC/Helitron (green), Simple repeat (blue-green), SINE (sky-blue), Unknown (purple) and low complexity sequences (pink).

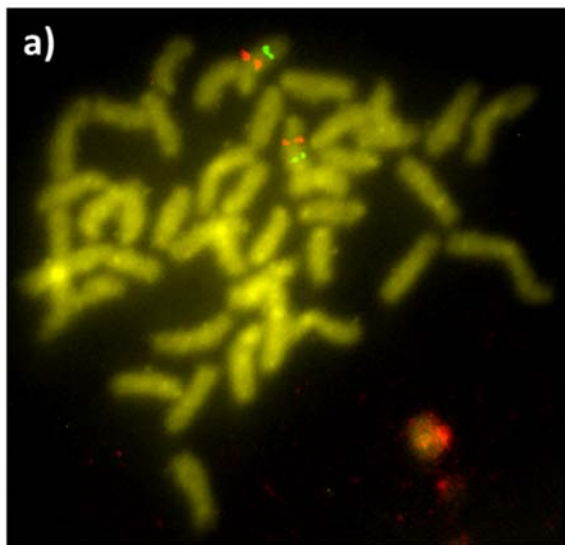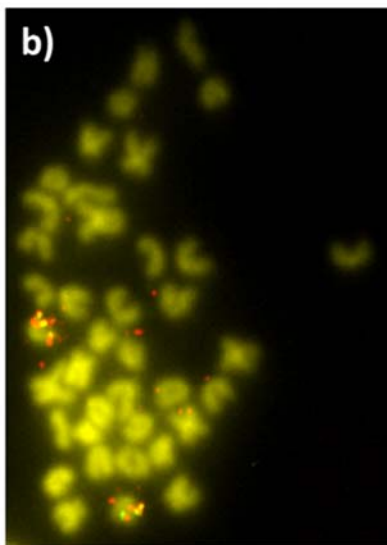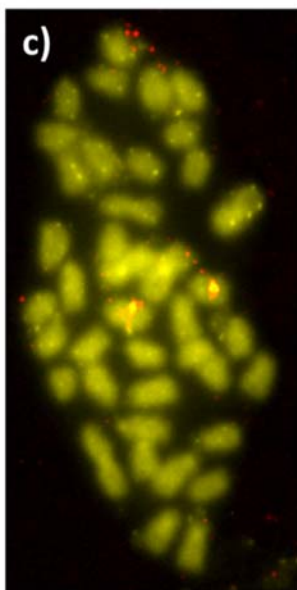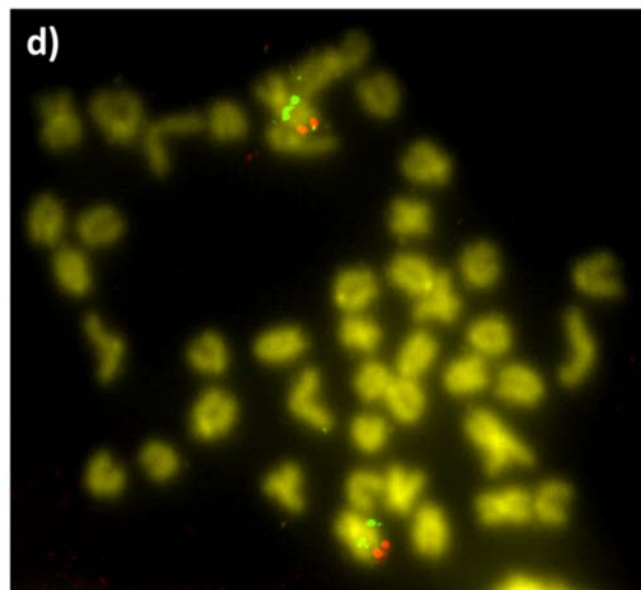



**Figure S5.** BAC-FISH of among *hox*-bearing BAC clones and BAC probes used as chromosome markers for *Solea senegalensis* karyotype: a) *hoxab* (red)-BAC 54E18 (green); b) *hoxbb* (green)-BAC 38B21 (red); c) *hoxca* (green)-BAC 4M14 (red); d) *hoxda* (green)-BAC 36J2 (red).

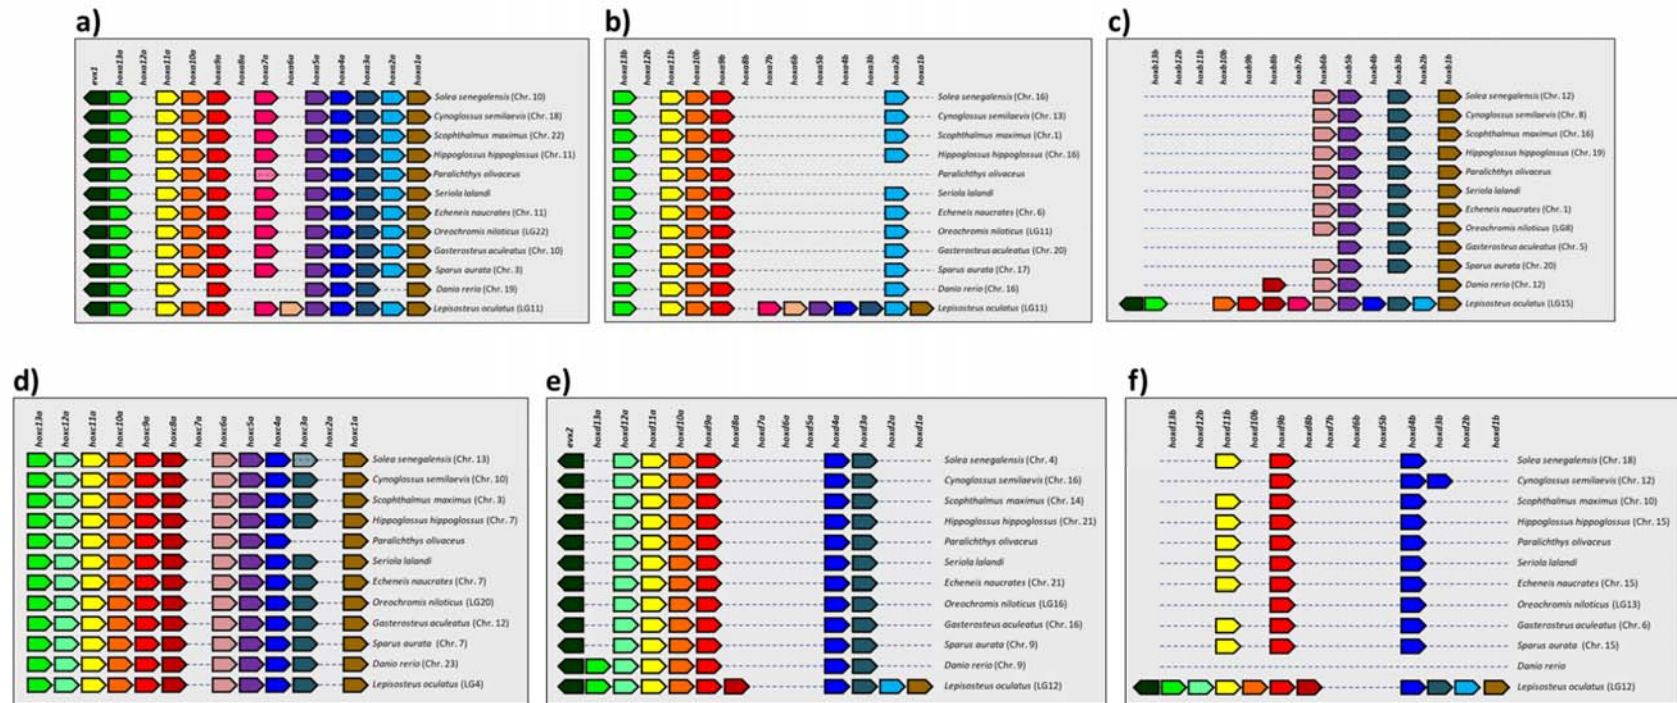

**Figure S6.** Schematic representation of the (a) *hoxaa*, (b) *hoxab*, (c) *hoxbb*, (d) *hoxca*, (e) *hoxda* and (f) *hoxdb* clusters synteny among different fish species. Same colors represent same genes. Transparent boxes represent genes that were positioned by means of different scaffolds.

**Table S2.** Polymorphisms detected within teleost species referred to the consensus arrangement of each cluster.

| Cluster      | Consensus arrangement (5'-3')*                                                          | Polymorphism                                                                                                                                                                                                                                                                    |
|--------------|-----------------------------------------------------------------------------------------|---------------------------------------------------------------------------------------------------------------------------------------------------------------------------------------------------------------------------------------------------------------------------------|
| <i>hoxaa</i> | <i>evx1-hoxa13a-hoxa11a-hoxa10a-hoxa9a-hoxa7a-hoxa5a-hoxa4a-hoxa3a-hoxa2a-hoxa1a</i>    | Absence of <i>hoxa10a</i> , <i>hoxa7a</i> and <i>hoxa2a</i> in <i>D. rerio</i>                                                                                                                                                                                                  |
| <i>hoxab</i> | <i>hoxa13b-hoxa11b-hoxa10b-hoxa9b-hoxa2b</i>                                            | Absence of <i>hoxa2b</i> in <i>P. olivaceus</i>                                                                                                                                                                                                                                 |
| <i>hoxba</i> | <i>eve1-hoxb13a-hoxb9a-hoxb8a-hoxb7a-hoxb6a-hoxb5a-hoxb4a-hoxb3a-hoxb2a-hoxb1a</i>      | Inversion of <i>eve1</i> and <i>hoxb13a</i> in <i>C. semilaevis</i><br>Absence of <i>hoxb7a</i> in <i>C. semilaevis</i> , <i>H. hippoglossus</i> and <i>P. olivaceus</i><br>Absence of <i>hoxb8a</i> in <i>G. aculeatus</i><br><i>eve1</i> pseudogenization in <i>S. aurata</i> |
| <i>hoxbb</i> | <i>hoxb6b-hoxb5b-hoxb3b-hoxb1b</i>                                                      | Absence of <i>hoxb6b</i> in <i>G. aculeatus</i><br>Absence of <i>hoxb3b</i> in <i>D. rerio</i> and presence of <i>hoxb8b</i>                                                                                                                                                    |
| <i>hoxca</i> | <i>hoxc13a-hoxc12a-hoxc11a-hoxc10a-hoxc9a-hoxc8a-hoxc6a-hoxc5a-hoxc4a-hoxc3a-hoxc1a</i> | Absence of <i>hoxc3a</i> in <i>P. olivaceus</i>                                                                                                                                                                                                                                 |
| <i>hoxda</i> | <i>evx2-hoxd12a-hoxd11a-hoxd10a-hoxd9a-hoxd4a-hoxd3a</i>                                | Presence of <i>hoxd13a</i> in <i>D. rerio</i>                                                                                                                                                                                                                                   |
| <i>hoxdb</i> | <i>hoxd11b-hoxd9b-hoxd4b</i>                                                            | Absence of <i>hoxd11b</i> in <i>C. semilaevis</i> and <i>O. niloticus</i><br>Duplication of <i>hoxd4b</i> in <i>C. semilaevis</i><br>Cluster absence in <i>D. rerio</i>                                                                                                         |

\* For knowing the specific gene orientation, see figure 5 and supplementary material 6.

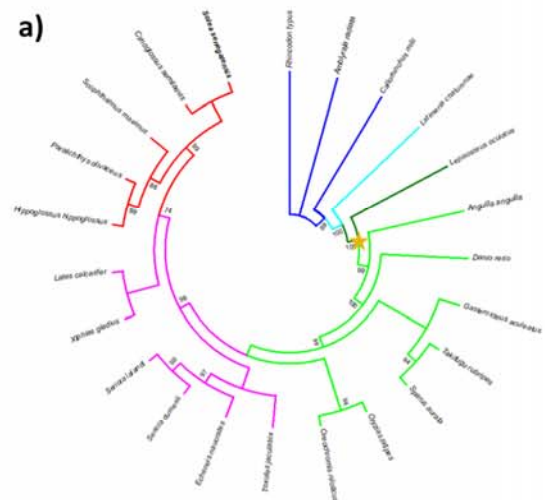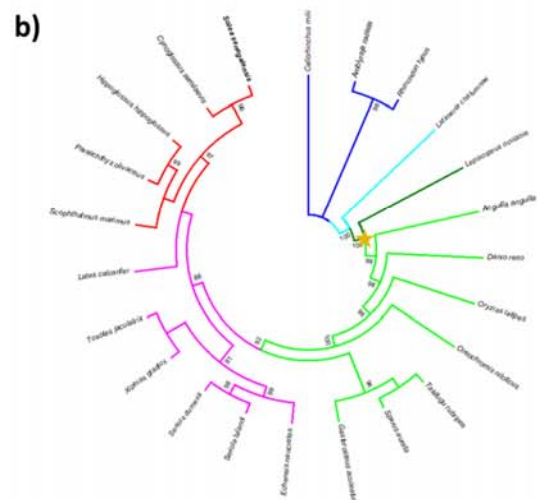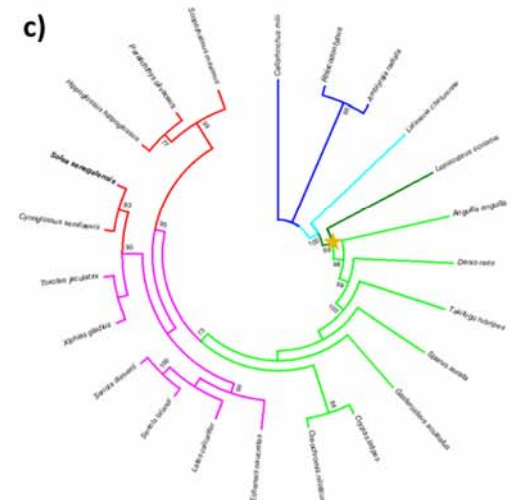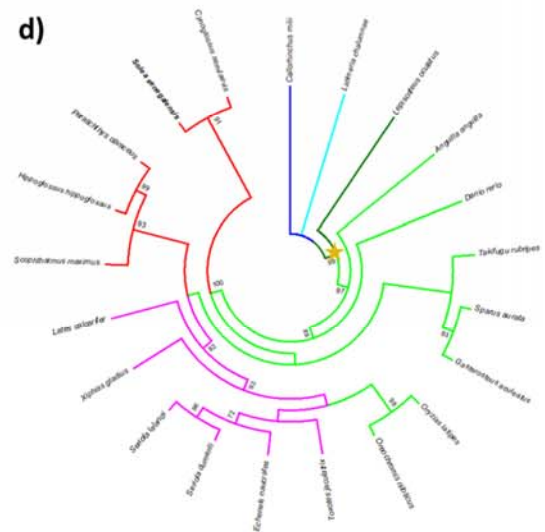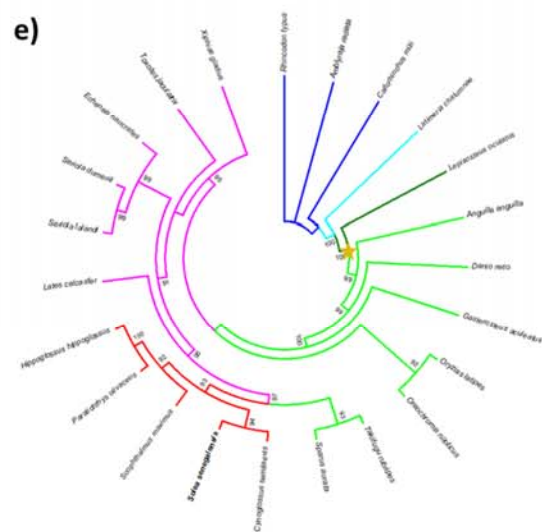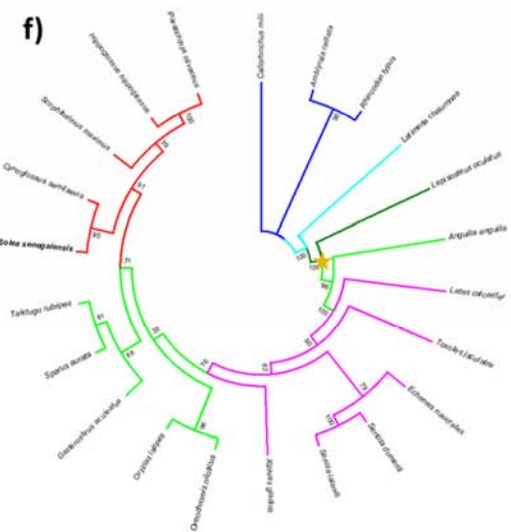

**Figure S7.** Phylogenetic trees constructed from clusters *hoxaa* (*hoxa1a*, *hoxa3a*, *hoxa4a*, *hoxa5a*, *hoxa9a*, *hoxa11a*, *hoxa13a*, *evx1*), *hoxab* (*hoxa9b*, *hoxa10b*, *hoxa11b*, *hoxa13b*), *hoxbb* (*hoxb1b*, *hoxb5b*), *hoxca* (*hoxc5a*, *hoxc6a*, *hoxc8a*, *hoxc9a*, *hoxc10a*, *hoxc11a*, *hoxc12a*, *hoxc13a*), *hoxda* (*hoxd3a*, *hoxd4a*, *hoxd10a*, *hoxd12a*, *evx2*) and *hoxdb* (*hoxd4b*, *hoxd9b*). Blue lines: Chondrichthyes lineage; cyan lines: Sarcophtherygii lineage; dark green lines: non-Teleostei Actinopterygii lineage; light green + pink + red lines: Teleostei lineage; pink + red lines: Carangaria lineage; red lines: Pleuronectiformes lineage. Yellow star denotes the teleost-specific genome duplication (TSGD) event.
